# Supplementary material for: PHD2 Mutation and Congenital Erythrocytosis with Paraganglioma
Source: Atypon-hosted journal article supplement (doi:10.1056/nejmoa0806277), 2008-12-17

## Supplementary Appendix

This appendix has been provided by the authors to give readers additional information about their work.

Supplement to: Ladroue C, Carcenac R, Leporrier M, et al. *PHD2* mutation and congenital erythrocytosis with paraganglioma. *N Engl J Med* 2008;359:2685-92.

## **PHD2 (EGLN1) primers and PCR conditions**

Designed using UCSC «Exon Primer»:  
<http://genome.ucsc.edu/cgi-bin/hgGateway>

With cDNA sequence: NM\_022051 and genomic sequence: hg18\_chr1:229567053-229628413\_rev

### **Exon 1 (3 fragments)**

#### **Exon 1a**

LEFT PRIMER GCAGTAACGGCCCCTATCTC  
RIGHT PRIMER GGCCTTTACTTTTCCCTTGG  
PRODUCT SIZE: 453 bp

#### **Exon 1b**

LEFT PRIMER GGACTGGAAGAAGCACAAAGC  
RIGHT PRIMER ATCTGCTGTCCGGTCTCCTT  
PRODUCT SIZE: 519 bp

#### **Exon 1c**

LEFT PRIMER CAGGAGAAGGCGAACCTGTA  
RIGHT PRIMER GAGGAATGCTGCTTCTCAGC  
PRODUCT SIZE: 520 bp

### **Exon 2**

LEFT PRIMER TCAGAGATCTGATTTATTAGCTGTTC  
RIGHT PRIMER GAAGTATGAAACTTAATGCTTTTGAG  
PRODUCT SIZE: 272 bp

### **Exon 3**

LEFT PRIMER CCCCTAAATTTAATCTTGTAGCAT  
RIGHT PRIMER CAGATTCCTCCTGTCCCTACC  
PRODUCT SIZE: 259 bp

### **Exon 4**

LEFT PRIMER CCATTGCAGCAAAAATACCAC  
RIGHT PRIMER CATCACCTGATTGCAGGGTA  
PRODUCT SIZE: 197 bp

### **Exon 5**

LEFT PRIMER TGAATGCAGTAGCAGAAGC  
RIGHT PRIMER TTTGATGCAACACAAAAGTTG  
PRODUCT SIZE: 284 bp

Duplex PCR with HotStarTaq (Qiagen) on ABI9700 (Applied Biosystems):

PHD2-1b + PHD2-3: Tm=54°C

PHD2-1c + PHD2-2: Tm=54°C

PHD2-5 + PHD2-4: Tm=54°C

PHD2-1a: Tm=58°C

# 2B

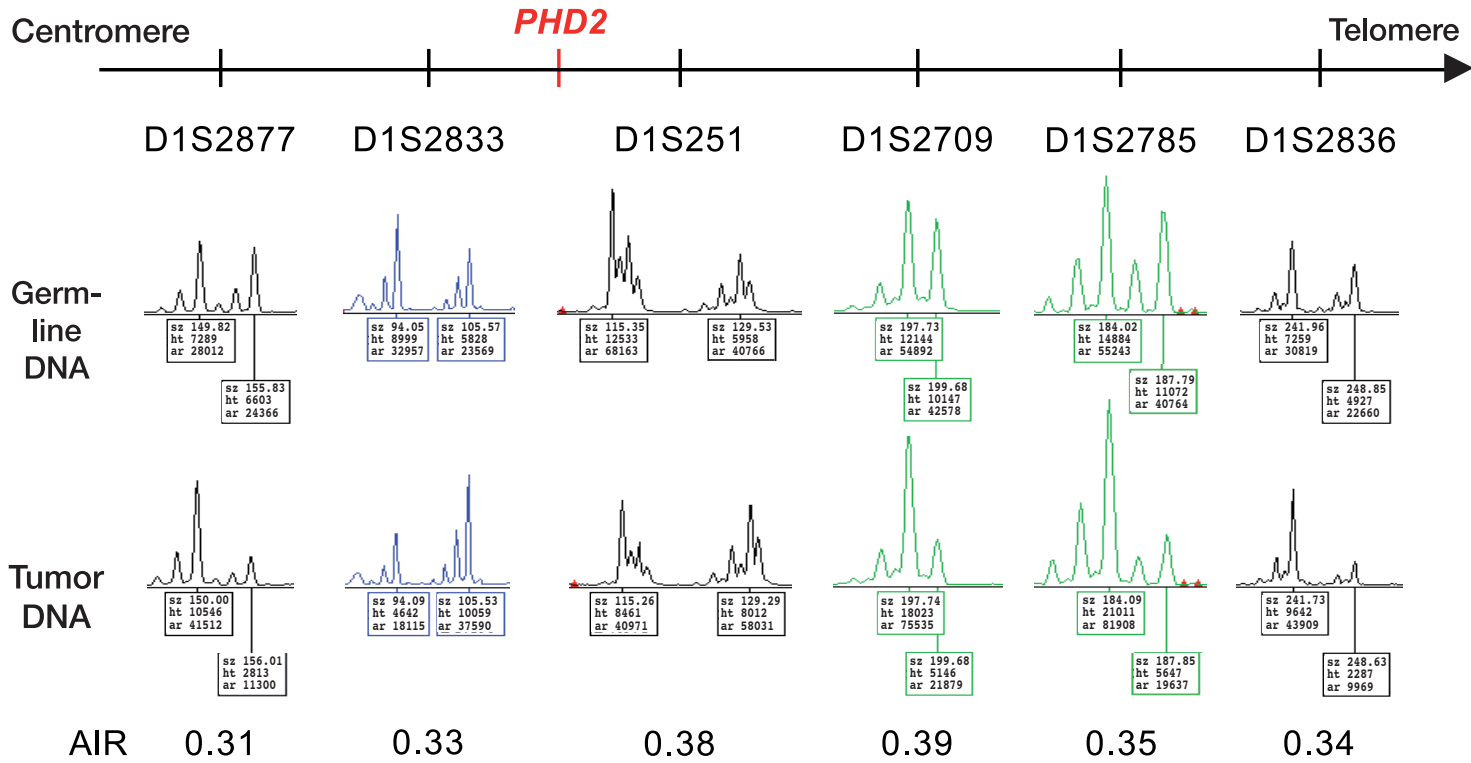

Supplement: nejm_ladroue_2685sa1.pdf [file nejm_ladroue_2685sa1.pdf]
